# Supplementary material for: Determination of cadmium in geological samples by aerosol dilution ICP-MS after inverse aqua regia extraction
Source: Royal Society of Chemistry journal article supplement (doi:10.1039/c5ja00182j), 2015-01-01
Supplement: c5ja00182j1.pdf [file c5ja00182j1.pdf]

## Technique Note

# Determination of cadmium in geological samples by aerosol dilution ICP-MS after inverse aqua regia extraction

Qian Xu, Wei Guo\*, Lanlan Jin, Qinghai Guo, Shenghong Hu\*

*State Key Laboratory of Biogeology and Environmental Geology, China University of Geosciences, Wuhan,  
430074, P. R. China*

\*Corresponding Author. Tel and Fax: +86-27-67883495

Email address: [Wei.Guo@cug.edu.cn](mailto:Wei.Guo@cug.edu.cn) (Wei Guo); [Shhu@cug.edu.cn](mailto:Shhu@cug.edu.cn) (Shenghong Hu).

## Supplementary Information

1. **Table S1.** Spectral interferences on Cd isotopes.
2. **Table S2.** The Cd levels in 77 Chinese geological SRMs by the proposed method,  $\mu\text{g g}^{-1}$ .
3. **Table S3.** Closed pressurized digestion with a mixture of HF + HNO<sub>3</sub>.
4. **Table S4.** The Ag levels in 8 geological SRMs by the proposed method,  $\mu\text{g g}^{-1}$ .
5. **Fig.S1.** Comparison of the SBR of three analysis method for Cd determination under the respective optimized conditions. Methods are: conventional standard mode ICP-QMS after complete digestion, aerosol dilution ICP-QMS after complete digestion, and aerosol dilution ICP-QMS after boiling inverse aqua regia extraction. The certified Cd concentration ( $1 \text{ ng mL}^{-1}$ ) and the matrix element concentrations ( $200 \text{ ng mL}^{-1}$  Mo and  $1000 \text{ ng mL}^{-1}$  Zr) were used to calculate the SBR values. 90% Zr was removed by the boiling inverse aqua regia extraction.
6. **Fig.S2.** Stability of Cd values obtained by aerosol dilution ICP-MS in SRM GSM-1. Mean  $\pm$  SD, the SD is the standard deviation for ten separate aliquots of the samples analyzed over a period of three months. The error bars in Figure were defined as the standard deviation for 3 replicates in single analysis.

**Table S1.** Spectral interferences on Cd isotopes

| Analyte           |               | Interference ions (Abundance, %) |                           |
|-------------------|---------------|----------------------------------|---------------------------|
| Isotope           | Abundance (%) | Polyatomic                       | Isobaric                  |
| <sup>106</sup> Cd | 1.25          | <sup>89</sup> YOH (100)          | <sup>106</sup> Pd (27.33) |
|                   |               | <sup>90</sup> ZrO (51.45)        |                           |
|                   |               | <sup>91</sup> ZrOH (11.22)       |                           |
| <sup>108</sup> Cd | 0.89          | <sup>92</sup> ZrO (17.15)        | <sup>108</sup> Pd (26.46) |
|                   |               | <sup>92</sup> MoO (14.53)        |                           |
|                   |               | <sup>93</sup> NbOH (100)         |                           |
| <sup>110</sup> Cd | 12.49         | <sup>94</sup> MoO (9.15)         | <sup>110</sup> Pd (11.72) |
|                   |               | <sup>94</sup> ZrO (17.38)        |                           |
|                   |               | <sup>94</sup> ZrOH (17.38)       |                           |
| <sup>111</sup> Cd | 12.8          | <sup>94</sup> MoOH (9.15)        | /                         |
|                   |               | <sup>95</sup> MoO (15.84)        |                           |
|                   |               | <sup>95</sup> MoOH (15.84)       |                           |
| <sup>112</sup> Cd | 24.13         | <sup>96</sup> MoO (16.67)        | <sup>112</sup> Sn (0.97)  |
|                   |               | <sup>96</sup> ZrO (2.8)          |                           |
|                   |               | <sup>96</sup> ZrOH (2.8)         |                           |
| <sup>113</sup> Cd | 12.22         | <sup>96</sup> MoOH (16.67)       | <sup>113</sup> In (4.29)  |
|                   |               | <sup>97</sup> MoO (9.6)          |                           |
|                   |               | <sup>97</sup> MoOH (9.6)         |                           |
| <sup>114</sup> Cd | 28.73         | <sup>98</sup> MoO (24.39)        | <sup>114</sup> Sn (0.66)  |
|                   |               | <sup>98</sup> RuO (1.87)         |                           |
|                   |               | <sup>99</sup> RuOH (12.76)       |                           |
| <sup>116</sup> Cd | 7.49          | <sup>100</sup> RuO (12.6)        | <sup>116</sup> Sn (14.54) |
|                   |               | <sup>100</sup> MoO (9.82)        |                           |

**Table S2.** The Cd levels in 77 Chinese geological SRMs by the proposed method,  $\mu\text{g g}^{-1}$ 

| Geological SRMs | Description           | Determined values (N=3)           | Certified values  |                   |
|-----------------|-----------------------|-----------------------------------|-------------------|-------------------|
| Soil            | GSS-1                 | Dark-brown earth                  | $4.10 \pm 0.10$   | $4.30 \pm 0.40$   |
|                 | GSS-2                 | Chestnut soil                     | $0.061 \pm 0.004$ | $0.071 \pm 0.014$ |
|                 | GSS-3                 | Yellow-brown earth                | $0.054 \pm 0.001$ | $0.060 \pm 0.009$ |
|                 | GSS-4                 | Limy red earth                    | $0.321 \pm 0.003$ | $0.350 \pm 0.060$ |
|                 | GSS-5                 | Yellow-red earth                  | $0.460 \pm 0.020$ | $0.450 \pm 0.060$ |
|                 | GSS-6                 | Yellow-red earth                  | $0.134 \pm 0.007$ | $0.130 \pm 0.030$ |
|                 | GSS-7                 | Laterite(latosol)                 | $0.088 \pm 0.008$ | $0.080 \pm 0.020$ |
|                 | GSS-8                 | Loess                             | $0.115 \pm 0.008$ | $0.130 \pm 0.020$ |
|                 | GSS-9                 | Soil                              | $0.089 \pm 0.002$ | $0.100 \pm 0.020$ |
|                 | GSS-10                | Farming soil                      | $0.099 \pm 0.008$ | $0.105 \pm 0.013$ |
|                 | GSS-11                | Soil                              | $0.115 \pm 0.008$ | $0.125 \pm 0.012$ |
|                 | GSS-12                | Soil                              | $0.140 \pm 0.007$ | $0.150 \pm 0.020$ |
|                 | GSS-13                | Soil                              | $0.120 \pm 0.002$ | $0.130 \pm 0.010$ |
|                 | GSS-14                | Soil                              | $0.200 \pm 0.010$ | $0.200 \pm 0.020$ |
|                 | GSS-15                | Soil                              | $0.213 \pm 0.009$ | $0.210 \pm 0.020$ |
|                 | GSS-16                | Sandy soil                        | $0.264 \pm 0.004$ | $0.250 \pm 0.020$ |
|                 | GSS-17                | Saline-alkali soil                | $0.055 \pm 0.002$ | $0.058 \pm 0.011$ |
|                 | GSS-18                | Brown desert soil                 | $0.140 \pm 0.009$ | $0.150 \pm 0.010$ |
|                 | GSS-19                | Saline-alkali soil                | $0.099 \pm 0.008$ | $0.108 \pm 0.009$ |
|                 | GSS-20                | Sierozem soil                     | $0.103 \pm 0.005$ | $0.108 \pm 0.011$ |
|                 | GSS-21                | The Yellow Sea tidal flat soil    | $0.132 \pm 0.002$ | $0.139 \pm 0.008$ |
|                 | GSS-22                | Soil                              | $0.058 \pm 0.003$ | $0.065 \pm 0.012$ |
|                 | GSS-23                | Tidal flat soil                   | $0.130 \pm 0.010$ | $0.150 \pm 0.020$ |
|                 | GSS-24                | Soil                              | $0.102 \pm 0.004$ | $0.106 \pm 0.007$ |
|                 | GSS-25                | Huai River soil                   | $0.167 \pm 0.008$ | $0.175 \pm 0.010$ |
|                 | GSS-26                | Yangtze River soil                | $0.130 \pm 0.005$ | $0.140 \pm 0.010$ |
|                 | GSS-27                | Soil                              | $0.570 \pm 0.010$ | $0.590 \pm 0.040$ |
|                 | GSS-28                | Soil                              | $0.520 \pm 0.030$ | $0.520 \pm 0.030$ |
| Sediment        | GSD-1                 | Granite area sediment             | $0.075 \pm 0.008$ | $0.088 \pm 0.014$ |
|                 | GSD-2                 | Stream sediment                   | $0.060 \pm 0.003$ | $0.065 \pm 0.011$ |
|                 | GSD-3                 | Porphyry copper deposit sediment  | $0.090 \pm 0.010$ | $0.100 \pm 0.020$ |
|                 | GSD-4                 | Limestone ore district sediment   | $0.192 \pm 0.003$ | $0.190 \pm 0.020$ |
|                 | GSD-5                 | Skarn mining area sediment        | $0.840 \pm 0.030$ | $0.820 \pm 0.050$ |
|                 | GSD-6                 | Porphyry copper deposit sediment  | $0.425 \pm 0.013$ | $0.430 \pm 0.030$ |
|                 | GSD-7                 | Stream sediment                   | $1.20 \pm 0.06$   | $1.05 \pm 0.06$   |
|                 | GSD-8                 | Acidic volcano rock area sediment | $0.074 \pm 0.003$ | $0.081 \pm 0.012$ |
|                 | GSD-9                 | Yangtze River sediment            | $0.250 \pm 0.030$ | $0.260 \pm 0.040$ |
|                 | GSD-10                | Carbonate area sediment           | $1.160 \pm 0.045$ | $1.12 \pm 0.08$   |
|                 | GSD-11                | Multi metal mining area sediment  | $2.33 \pm 0.05$   | $2.30 \pm 0.20$   |
|                 | GSD-12                | Stream sediment                   | $4.20 \pm 0.30$   | $4.00 \pm 0.30$   |
|                 | GSD-13                | Quartz sand area sediment         | $0.031 \pm 0.001$ | $0.045 \pm 0.015$ |
|                 | GSD-14                | Sediment                          | $0.180 \pm 0.010$ | $0.200 \pm 0.030$ |
|                 | GSD-15                | Multi metal mining area sediment  | $0.325 \pm 0.008$ | $0.340 \pm 0.020$ |
|                 | GSD-16                | Metamorphic rock area sediment    | $0.084 \pm 0.010$ | $0.093 \pm 0.009$ |
|                 | GSD-17                | Stream sediment                   | $4.50 \pm 0.30$   | $4.30 \pm 0.50$   |
|                 | GSD-18                | Granite area sediment             | $0.091 \pm 0.005$ | $0.095 \pm 0.010$ |
|                 | GSD-19                | Stream sediment                   | $0.088 \pm 0.007$ | $0.120 \pm 0.01$  |
|                 | GSD-20                | Copper nickel mine sediment       | $0.216 \pm 0.005$ | $0.220 \pm 0.010$ |
|                 | GSD-21                | Acidic volcano rock area sediment | $0.780 \pm 0.04$  | $0.760 \pm 0.030$ |
|                 | GSD-22                | Copper ore district sediment      | $0.164 \pm 0.002$ | $0.165 \pm 0.010$ |
|                 | GSD-23                | Stream sediment                   | $4.69 \pm 0.07$   | $4.80 \pm 0.50$   |
| GSD-1a          | Granite area sediment | $0.091 \pm 0.006$                 | $0.110 \pm 0.030$ |                   |

|        |           |                                   |                   |                   |
|--------|-----------|-----------------------------------|-------------------|-------------------|
|        | GSD-2a    | Granite area sediment             | $0.102 \pm 0.004$ | $0.108 \pm 0.009$ |
|        | GSD-3a    | Copper nickel mine sediment       | $0.493 \pm 0.005$ | $0.500 \pm 0.060$ |
|        | GSD-4a    | Limestone area sediment           | $0.850 \pm 0.060$ | $0.900 \pm 0.050$ |
|        | GSD-5a    | Skarn mining area sediment        | $1.36 \pm 0.08$   | $1.37 \pm 0.10$   |
|        | GSD-7a    | Lead zinc mine sediment           | $5.20 \pm 0.20$   | $5.60 \pm 0.60$   |
|        | GSD-8a    | Acidic volcano rock area sediment | $0.150 \pm 0.010$ | $0.160 \pm 0.010$ |
| Rock   | GSR-2     | Andesite                          | $0.062 \pm 0.007$ | $0.061 \pm 0.014$ |
|        | GSR-4     | Quartz sandstone                  | $0.055 \pm 0.005$ | $0.060 \pm 0.016$ |
|        | GSR-6     | Argillaceous limestone            | $0.062 \pm 0.030$ | $0.070 \pm 0.020$ |
|        | GSR-8     | Lujavritite                       | $0.660 \pm 0.030$ | $0.610 \pm 0.080$ |
|        | GSR-10    | Gabbro                            | $0.069 \pm 0.003$ | $0.090 \pm 0.030$ |
|        | GSR-11    | Rhyolite                          | $0.150 \pm 0.010$ | $0.140 \pm 0.020$ |
|        | GSR-12    | Dolomite                          | $0.067 \pm 0.003$ | $0.070 \pm 0.020$ |
|        | GSR-16    | Diabase                           | $0.370 \pm 0.010$ | $0.390 \pm 0.080$ |
|        | GSR-17    | Kimberlite                        | $0.570 \pm 0.050$ | $0.460 \pm 0.200$ |
|        | GSR-22    | Limestone                         | $0.121 \pm 0.011$ | /                 |
|        | GSR-23    | Limestone                         | $0.770 \pm 0.040$ | /                 |
|        | GSR-24    | Limestone                         | $0.063 \pm 0.006$ | /                 |
|        | GSR-27    | Limestone                         | $0.550 \pm 0.050$ | /                 |
|        | GSR-28    | Limestone                         | $0.510 \pm 0.030$ | /                 |
|        | GUI-1     | Limestone                         | $0.042 \pm 0.005$ | /                 |
|        | GUI-1     | Limestone                         | $0.160 \pm 0.017$ | /                 |
|        | DIAN-1    | Limestone                         | $0.520 \pm 0.030$ | /                 |
|        | DIAN-2    | Limestone                         | $0.366 \pm 0.027$ | /                 |
| DIAN-3 | Limestone | $0.209 \pm 0.015$                 | /                 |                   |

**Table S3.** Closed pressurized digestion with a mixture of HF + HNO<sub>3</sub>

| Step | Description                                                                                                                                                       |
|------|-------------------------------------------------------------------------------------------------------------------------------------------------------------------|
| 1    | 50 mg sample powder (< 200 mesh) was weighed into a Teflon bomb, moistened with a few drops of ultrapure water.                                                   |
| 2    | 1.0 mL HNO <sub>3</sub> +1.0 ml HF were added. The sealed bomb was heated at 190 °C in oven for > 48 h.                                                           |
| 3    | Open the bomb and evaporate the solution at ~120 °C to dryness. This was followed by adding 1 ml HNO <sub>3</sub> and evaporating to the second round of dryness. |
| 4    | The resultant salt was re-dissolved by adding ~3 ml of 30% HNO <sub>3</sub> and resealed and heated in the bomb at 190 °C for >12 h.                              |
| 5    | The final solution was diluted to ~100 g with mixture of 2% HNO <sub>3</sub> for ICP-MS analysis.                                                                 |

**Table S4.** The Ag levels in 8 geological SRMs by the proposed method,  $\mu\text{g g}^{-1}$ 

| Geological SRMs                            | Determined values | Certified values  |
|--------------------------------------------|-------------------|-------------------|
|                                            | (N=3)             |                   |
| GSS-1, Dark-brown earth                    | $0.365 \pm 0.004$ | $0.35 \pm 0.05$   |
| GSS-6, Yellow-red earth                    | $0.180 \pm 0.006$ | $0.2 \pm 0.02$    |
| GSS-7, Laterite (latosol)                  | $0.063 \pm 0.009$ | $0.057 \pm 0.011$ |
| GSD-3, Porphyry copper deposit<br>sediment | $0.57 \pm 0.01$   | $0.59 \pm 0.05$   |
| GSD-6, Porphyry copper deposit<br>sediment | $0.351 \pm 0.011$ | $0.36 \pm 0.03$   |
| GSR-2, Andesite                            | $0.059 \pm 0.003$ | $0.071 \pm 0.009$ |
| GSR-4, Quartz sandstone                    | $0.057 \pm 0.002$ | $0.062 \pm 0.007$ |
| BCR-2, basalt                              | $0.035 \pm 0.001$ | $0.041 \pm 0.004$ |

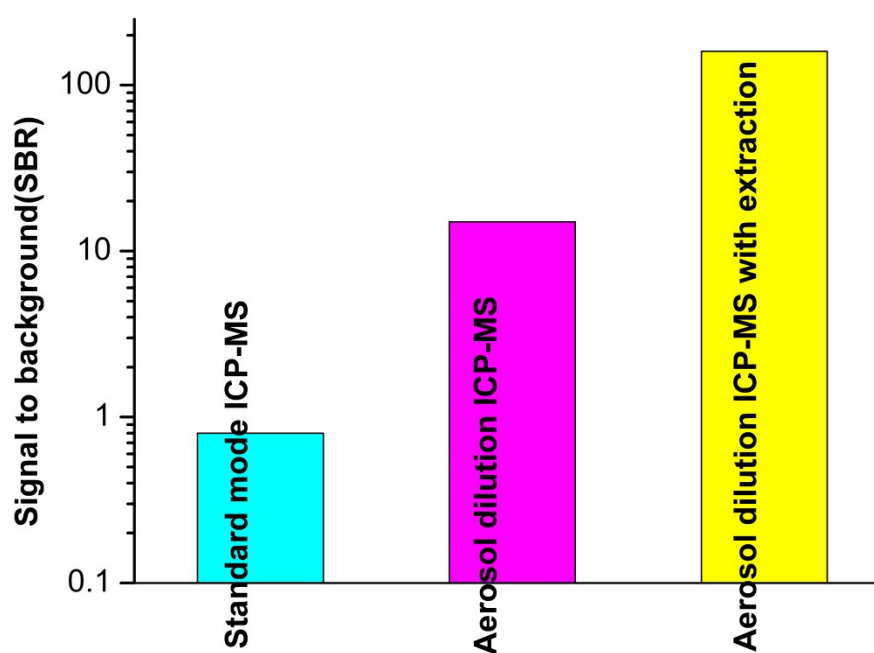

**Fig.S1.** Comparison of the SBR of three analysis method for Cd determination under the respective optimized conditions. Methods are: conventional standard mode ICP-QMS after complete digestion, aerosol dilution ICP-QMS after complete digestion, and aerosol dilution ICP-QMS after boiling inverse aqua regia extraction. The certified Cd concentration ( $1 \text{ ng mL}^{-1}$ ) and the matrix element concentrations ( $200 \text{ ng mL}^{-1}$  Mo and  $1000 \text{ ng mL}^{-1}$  Zr) were used to calculate the SBR values. 90% Zr was removed by the boiling inverse aqua regia extraction.

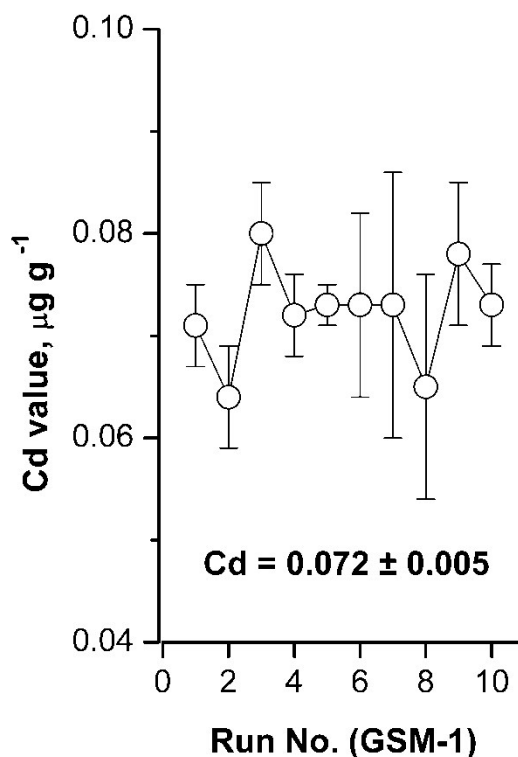

**Fig.S2.** Stability of Cd values obtained by aerosol dilution ICP-MS in SRM GSM-1. Mean  $\pm$  SD, the SD is the standard deviation for ten separate aliquots of the samples analyzed over a period of three months. The error bars in Figure were defined as the standard deviation for 3 replicates in single analysis.
